# Supplementary material for: Associations between multimorbidity and glycaemia (HbA1c) in people with type 2 diabetes: cross-sectional study in Australian general practice
Source: HighWire-hosted journal article supplement (doi:10.1136/bmjopen-2020-039625), 2020-11-01
Supplement: bmjopen-2020-039625supp002_data_supplement.pdf [file bmjopen-2020-039625supp002_data_supplement.pdf]

## Supplementary Document 2

**Table S2. Sensitivity analysis - multivariable linear regression model: Relationship between HbA1c(%) and multimorbidity in participants with type 2 diabetes.**

| Predictor variables                                     | Non-adjusted                  |              |       | Adjusted*                     |             |       |
|---------------------------------------------------------|-------------------------------|--------------|-------|-------------------------------|-------------|-------|
|                                                         | Mean difference in HbA1c (SE) | 95% CI       | p     | Mean difference in HbA1c (SE) | 95% CI      | p     |
| <b>Participants with HbA1c &gt; 7%</b>                  |                               |              |       |                               |             |       |
| <b>Categories of diabetes and multimorbidities</b>      |                               |              |       |                               |             |       |
| Diabetes present and no chronic conditions (reference)  |                               |              |       |                               |             |       |
| Diabetes present and 1 chronic condition                | 0.00 (0.03)                   | -0.07, 0.07  | 0.995 | 0.00 (0.04)                   | -0.07, 0.07 | 0.915 |
| Diabetes present and 2 chronic conditions               | -0.03 (0.03)                  | -0.10, 0.03  | 0.322 | -0.03 (0.03)                  | -0.10, 0.04 | 0.359 |
| Diabetes present and 3 chronic conditions               | 0.02 (0.03)                   | -0.05, 0.08  | 0.624 | 0.02 (0.03)                   | -0.05, 0.09 | 0.553 |
| Diabetes present and 4 or more chronic conditions       | 0.01 (0.03)                   | -0.05, 0.07  | 0.726 | 0.02 (0.03)                   | -0.04, 0.07 | 0.592 |
| <b>Categories of diabetes and concordant conditions</b> |                               |              |       |                               |             |       |
| Diabetes present and no chronic conditions (reference)  |                               |              |       |                               |             |       |
| Diabetes present and 1 concordant condition             | 0.02 (0.02)                   | -0.02, 0.05  | 0.422 | 0.02 (0.02)                   | -0.02, 0.06 | 0.315 |
| Diabetes present and 2 concordant conditions            | 0.02 (0.03)                   | -0.03, 0.07  | 0.338 | 0.04 (0.02)                   | -0.01, 0.09 | 0.122 |
| Diabetes present and 3 concordant conditions            | -0.02 (0.03)                  | -0.08, 0.05  | 0.609 | -0.02 (0.03)                  | -0.08, 0.05 | 0.650 |
| Diabetes present and 4 or more concordant conditions    | 0.03 (0.04)                   | -0.056, 0.11 | 0.513 | 0.03 (0.04)                   | -0.05, 0.11 | 0.472 |
| <b>Categories of diabetes and discordant conditions</b> |                               |              |       |                               |             |       |
| Diabetes present and no chronic conditions (reference)  |                               |              |       |                               |             |       |
| Diabetes present and 1 discordant condition             | -0.05 (0.03)                  | -0.10, 0.00  | 0.063 | -0.07 (0.03)                  | -0.12, 0.02 | 0.012 |
| Diabetes present and 2 discordant conditions            | -0.02 (0.03)                  | -0.07, 0.04  | 0.540 | -0.03 (0.03)                  | -0.08, 0.03 | 0.293 |
| Diabetes present and 3 discordant conditions            | 0.02 (0.03)                   | -0.04, 0.07  | 0.572 | 0.00 (0.03)                   | -0.06, 0.06 | 0.993 |
| Diabetes present and 4 or more discordant conditions    | 0.00 (0.03)                   | -0.05, 0.05  | 0.879 | -0.00 (0.03)                  | -0.05, 0.05 | 0.970 |
| <b>Participants with HbA1c ≤ 7%</b>                     |                               |              |       |                               |             |       |
| <b>Categories of diabetes and multimorbidities</b>      |                               |              |       |                               |             |       |
| Diabetes present and no chronic conditions (reference)  |                               |              |       |                               |             |       |

|                                                         |              |             |       |              |             |       |
|---------------------------------------------------------|--------------|-------------|-------|--------------|-------------|-------|
| Diabetes present and 1 chronic condition                | 0.01 (0.01)  | -0.02, 0.03 | 0.586 | 0.00 (0.01)  | -0.02, 0.02 | 0.929 |
| Diabetes present and 2 chronic conditions               | 0.01 (0.01)  | -0.01, 0.03 | 0.317 | 0.01 (0.01)  | -0.01, 0.03 | 0.562 |
| Diabetes present and 3 chronic conditions               | -0.01 (0.01) | -0.03, 0.01 | 0.548 | -0.01 (0.01) | -0.03, 0.01 | 0.277 |
| Diabetes present and 4 or more chronic conditions       | 0.00 (0.01)  | -0.02, 0.02 | 0.771 | 0.00 (0.01)  | -0.02, 0.02 | 0.978 |
| <b>Categories of diabetes and concordant conditions</b> |              |             |       |              |             |       |
| Diabetes present and no chronic conditions (reference)  |              |             |       |              |             |       |
| Diabetes present and 1 concordant condition             | 0.01 (0.01)  | 0.00, 0.02  | 0.233 | 0.01 (0.01)  | 0.00, 0.02  | 0.232 |
| Diabetes present and 2 concordant conditions            | 0.01 (0.01)  | 0.00, 0.03  | 0.076 | 0.01 (0.01)  | 0.00, 0.03  | 0.136 |
| Diabetes present and 3 concordant conditions            | 0.01 (0.01)  | -0.01, 0.03 | 0.480 | 0.00 (0.01)  | -0.02, 0.02 | 0.855 |
| Diabetes present and 4 or more concordant conditions    | 0.00 (0.01)  | -0.03, 0.02 | 0.939 | 0.00 (0.01)  | -0.03, 0.02 | 0.919 |
| <b>Categories of diabetes and discordant conditions</b> |              |             |       |              |             |       |
| Diabetes present and no chronic conditions (reference)  |              |             |       |              |             |       |
| Diabetes present and 1 discordant condition             | 0.01 (0.01)  | -0.01, 0.02 | 0.448 | 0.00 (0.01)  | -0.02, 0.02 | 0.921 |
| Diabetes present and 2 discordant conditions            | -0.02 (0.01) | -0.03, 0.00 | 0.027 | -0.02 (0.01) | -0.04, 0.00 | 0.020 |
| Diabetes present and 3 discordant conditions            | -0.01 (0.01) | -0.02, 0.01 | 0.495 | -0.01 (0.01) | -0.02, 0.01 | 0.462 |
| Diabetes present and 4 or more discordant conditions    | 0.00 (0.01)  | -0.02, 0.01 | 0.825 | 0.00 (0.01)  | -0.02, 0.01 | 0.628 |

SE: Standard error

\*Adjusting for age, sex, SEIFA, smoking status, and number of diabetes medication. All co-variables were treated as fixed effects and the general practice as a random effect to allow for the correlation of HbA1c within each practice.
